# Supplementary material for: Systems-based identification of the Hippo pathway for promoting fibrotic mesenchymal differentiation in systemic sclerosis
Source: PubMed Central journal article supplement (PMC10764940; doi:10.1038/s41467-023-44645-6), 2024-01-03
Supplement: 41467_2023_44645_MOESM3_ESM.pdf [file 41467_2023_44645_MOESM3_ESM.pdf]

### **Description of Additional Supplementary Files**

**Supplementary Data 1.** Demographics for systemic sclerosis patients.

**Supplementary Data 2.** Cell type, subtype, and sub-cluster marker genes in the scRNA-seq analyses.

**Supplementary Data 3.** Genes induced in fibroblasts after stimulation with TGF- $\beta$  or IL-4 from bulk RNA-seq experiments.

**Supplementary Data 4.** Genes in the five expression patterns along the fibroblast or endothelial pseudotime in the scRNA-seq analyses.

**Supplementary Data 5.** Common up-regulated genes in fibroblast group 3 vs group 1, 2 and endothelial sub-cluster 2 vs sub-cluster 0, 1.

**Supplementary Data 6.** Ligand-receptor pairs specific to SSc fibroblast and endothelial subtypes plotted in Fig. 6c.

**Supplementary Data 7.** Antibodies used in this study.
